# Supplementary material for: Controllable synthesis of single-crystal SnO2nanowires and tri-crystal SnO2nanobelts
Source: Royal Society of Chemistry journal article supplement (doi:10.1039/c8ce01507d), 2018-01-01
Supplement: c8ce01507d1.pdf [file c8ce01507d1.pdf]

## Supplementary information:

# Controllable Synthesis of Single Crystal SnO<sub>2</sub> Nanowires and Tri-crystal SnO<sub>2</sub> Nanobelts

Yanjie Wei<sup>a1</sup>, He Zheng<sup>a1</sup>, Shuaishuai Hu<sup>a</sup>, Shizhou Pu<sup>a</sup>, Huayu Peng<sup>a</sup>, Lei Li<sup>a</sup>,  
Huaping Sheng<sup>a</sup>, Siyuan Zhou<sup>a</sup>, Jianbo Wang<sup>ab</sup> and Shuangfeng Jia<sup>\*a</sup>

a School of Physics and Technology, Center for Electron Microscopy, MOE Key Laboratory of Artificial Micro- and Nano-structures, and Institute for Advanced Studies, Wuhan University, Wuhan 430072, China

b Science and Technology on High Strength Structural Materials Laboratory, Central South University, Changsha 410083, China

\*Email: sfjia@whu.edu.cn (Shuangfeng Jia)

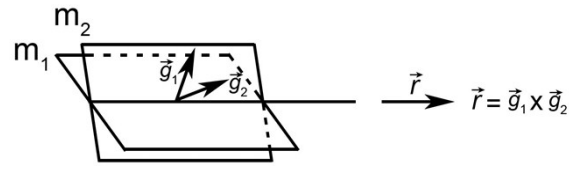

**Fig. S1.** Schematic illustration of determining the growth direction of NWs.  $\vec{g}_1$  and  $\vec{g}_2$  represent two reciprocal vectors perpendicular to the NW side-edge (axial direction), and  $\vec{r}$  indicates the growth (axial) direction of the NW.

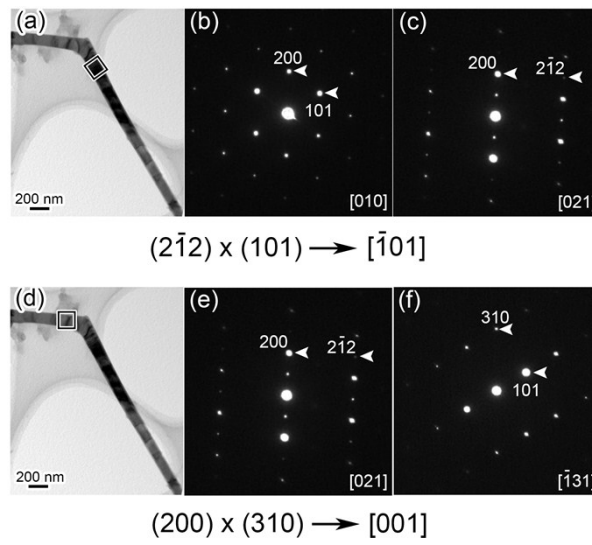

**Fig. S2.** The growth direction of single crystal nanowires, along from  $[\bar{1}01]$  to  $[001]$ .

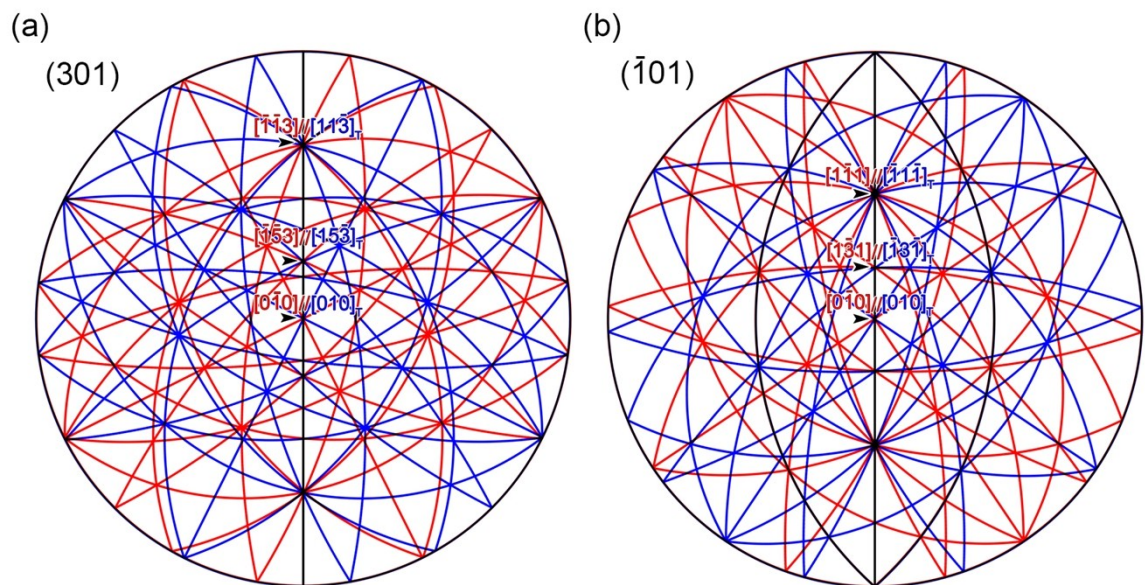

**Fig. S3.** (a-b) Calculated superposition stereographic projections of the Kikuchi patterns corresponding to (301) and  $(\bar{1}01)$  twins.

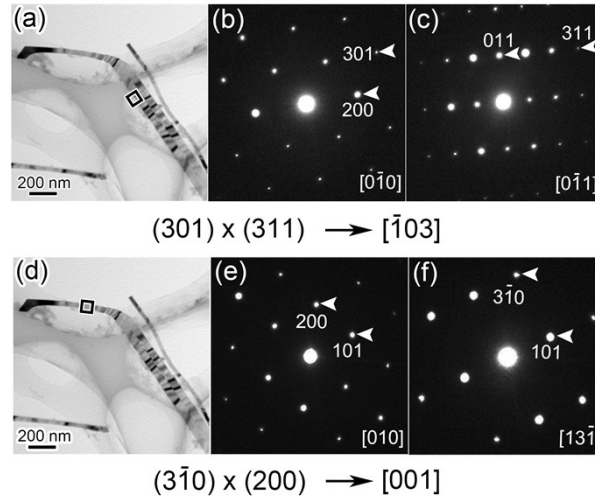

**Fig. S4.** The growth direction of tri-crystal nanobelts, along from  $[\bar{1}03]$  to [001].

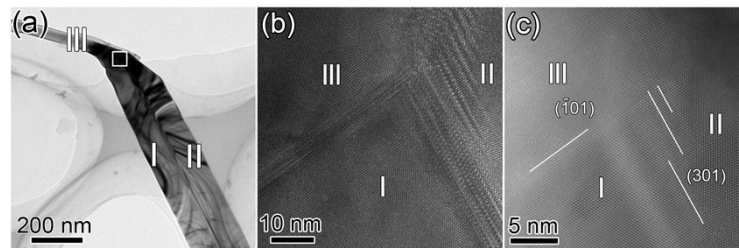

**Fig. S5.** (a) BF image of individual tri-crystal  $\text{SnO}_2$  of type II. (b) The boundary of tri-crystal with a lot of defects. (c) STEM image of the tri-crystal boundary.

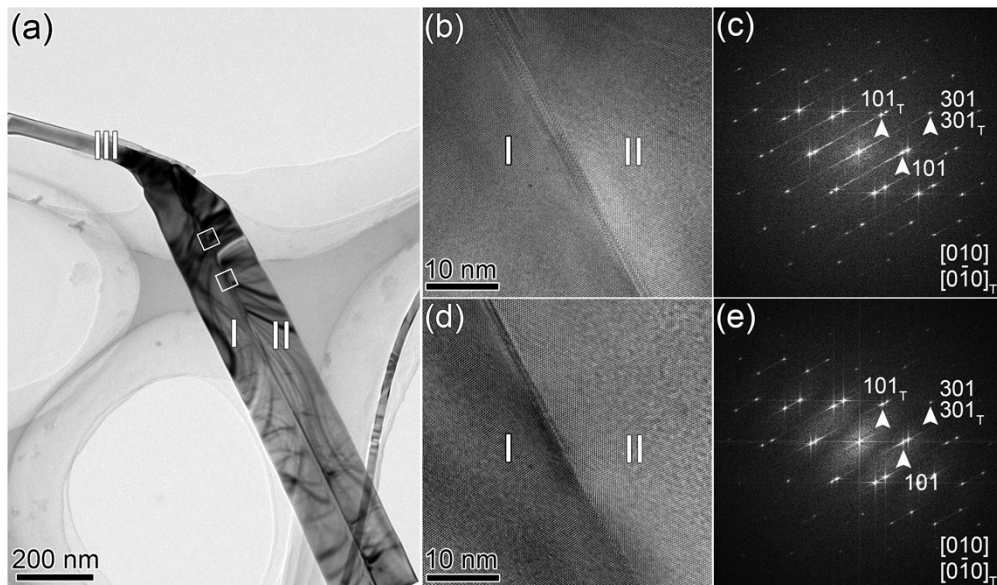

**Fig. S6.** (a) BF image of individual tri-crystal  $\text{SnO}_2$  of type II. (b-c) The HRTEM image from upper rectangular area in (a) and FFT pattern corresponding to (b). (d-e) The HRTEM image from lower rectangular area in (a) and FFT pattern corresponding to (c).

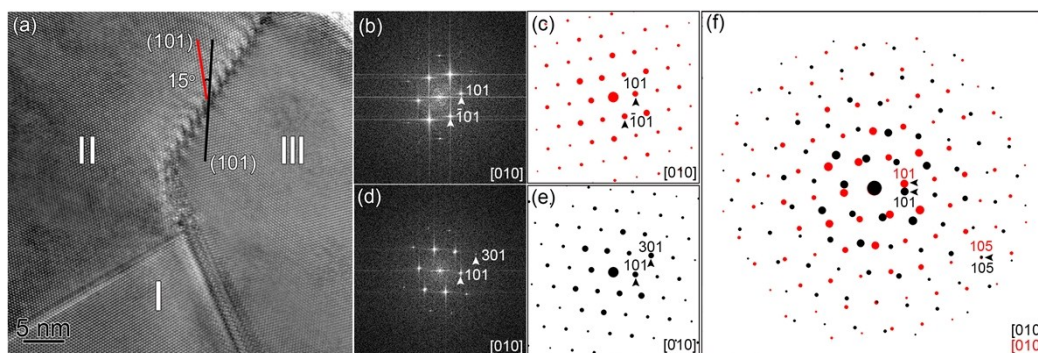

**Fig. S7.** (a) The HRTEM image of tri-crystal boundary. Part II clockwise rotation 15 degrees can coincide with Part III. (b-e) FFT image from part II and part III and corresponding simulated SAED patterns. (f) The superposition of (c) and (e) FFT simulations.
